# Supplementary material
Source: Springer Nature journal article supplement (https://www.springermedizin.de/resource/supplementary/13075_2011_3527_MOESM2_ESM.pdf/9694746)
Supplement: MOESM2 [file 9694746]

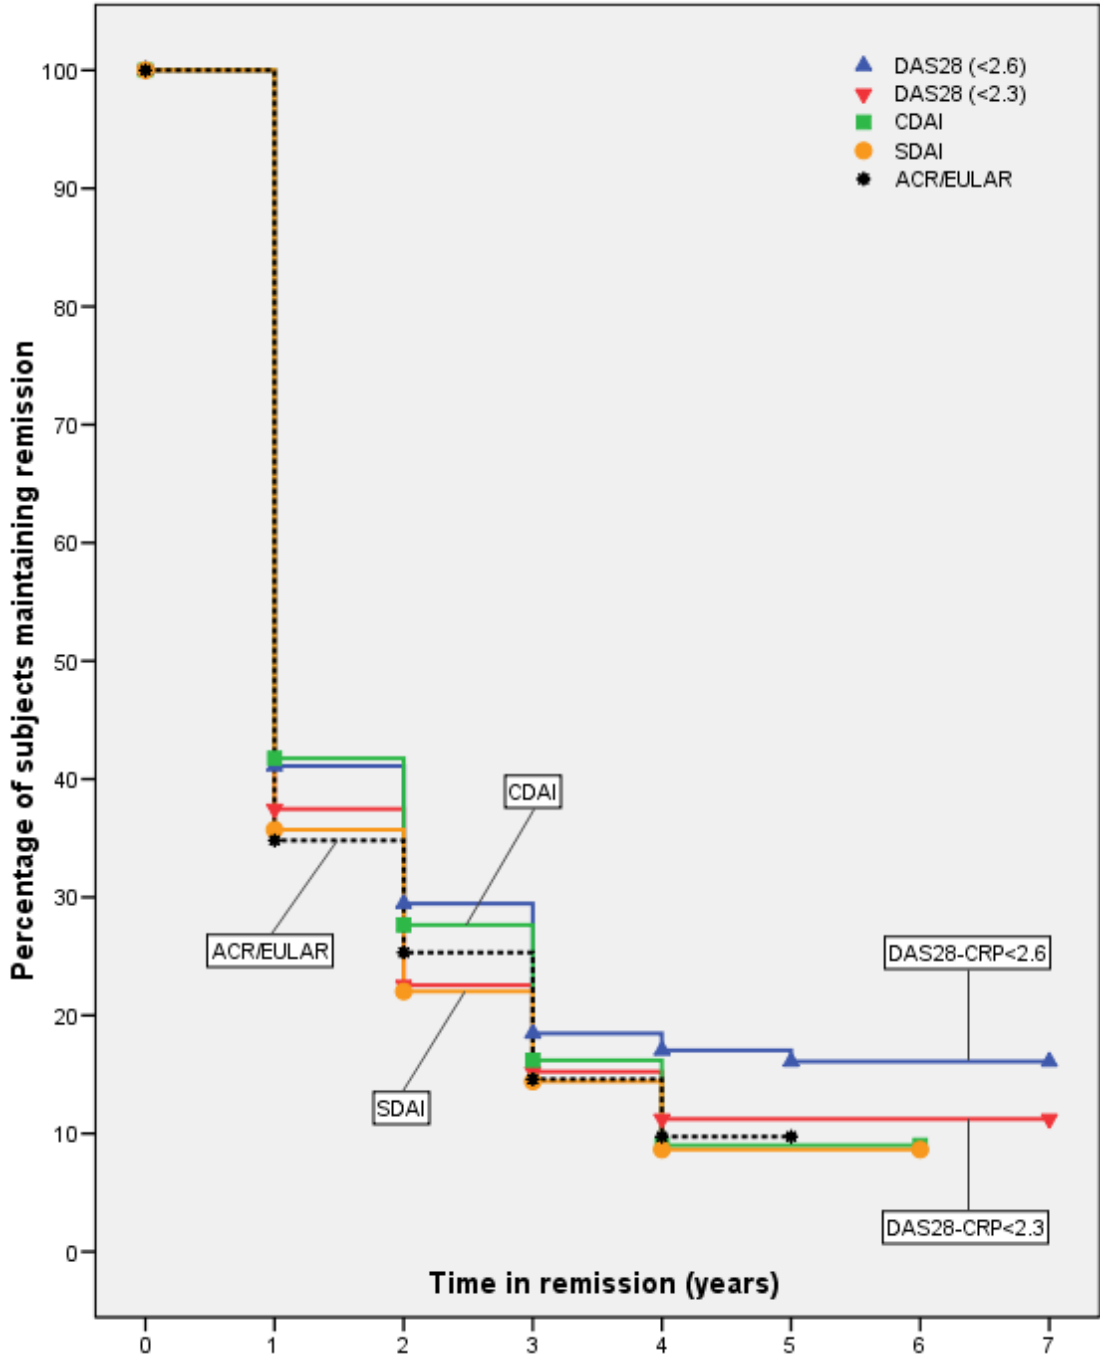

|                      |     |                    |                   |                  |                  |                   |                 |                 |
|----------------------|-----|--------------------|-------------------|------------------|------------------|-------------------|-----------------|-----------------|
| <b>DAS28 &lt;2.6</b> | 309 | 127 / 309<br>(41%) | 91 / 127<br>(72%) | 37 / 59<br>(63%) | 24 / 26<br>(92%) | 17 / 18<br>(94%)  | 8 / 8<br>(100%) | 1 / 1<br>(100%) |
| <b>DAS28 &lt;2.3</b> | 275 | 103 / 275<br>(38%) | 62 / 103<br>(60%) | 25 / 37<br>(68%) | 14 / 19<br>(74%) | 10 / 10<br>(100%) | 4 / 4<br>(100%) | 1 / 1<br>(100%) |
| <b>SDAI</b>          | 168 | 60 / 168<br>(36%)  | 37 / 60<br>(62%)  | 17 / 26<br>(65%) | 6 / 10<br>(60%)  | 3 / 3<br>(100%)   | 1 / 1<br>(100%) |                 |
| <b>CDAI</b>          | 170 | 71 / 170<br>(42%)  | 47 / 71<br>(66%)  | 17 / 29<br>(59%) | 5 / 9<br>(56%)   | 3 / 3<br>(100%)   | 1 / 1<br>(100%) |                 |
| <b>ACR/EULAR</b>     | 158 | 55 / 158<br>(35%)  | 40 / 55<br>(73%)  | 15 / 26<br>(58%) | 6 / 9<br>(67%)   | 4 / 4<br>(100%)   |                 |                 |
